# Supplementary material for: Trends, influencing factors and prediction analysis of under-five and maternal mortality rates in China from 1991 to 2020
Source: Front Public Health. 2023 Oct 19;11:1198356. doi: 10.3389/fpubh.2023.1198356 (PMC10620530; doi:10.3389/fpubh.2023.1198356)
Supplement: SUPPLEMENTARY TABLE 2 — The maternal system management rate, prenatal care rate, postnatal visit rate, hospital delivery rate, GDP, total health expenditure and the ratio of total health expenditure to GDP from 1991 to 2020 in China. [file Table_2.XLSX]

## Sheet: Sheet1
Year	GDP (million yuan)	THE (million yuan)	Proportion of THE in GDP (%)	System management rate (%)	Prenatal care rate (%)	Postpartum visit rate (%)	Hospital delivery rate (%)
1991	22005.6	893.49	4.06028				50.6
1992	27194.5	1096.86	4.03339		69.71	69.7	50.9
1993	35673.2	1377.78	3.86223		72.16	70.99	53.7
1994	48637.5	1761.24	3.62116		76.31	74.49	51.9
1995	61339.9	2155.13	3.51342		78.65	78.8	58.1
1996	71813.6	2709.42	3.77285	65.54	83.69	80.06	60.7
1997	79715	3196.71	4.01017	68.32	85.89	82.25	61.7
1998	85195.5	3678.72	4.31797	72.27	87.13	83.91	66.2
1999	90564.4	4047.5	4.4692	75.37	89.25	85.86	70
2000	100280	4586.63	4.57382	77.16	89.36	86.15	72.9
2001	110863	5025.93	4.53346	78.57	90.31	87.15	76
2002	121717	5790.03	4.75695	78.16	90.14	86.7	78.8
2003	137422	6584.1	4.79115	75.5	88.9	85.4	79.4
2004	161840	7590.29	4.68999	76.4	89.7	85.9	82.8
2005	187319	8659.91	4.62308	76.7	89.8	86	85.9
2006	219438	9843.34	4.48569	76.5	89.7	85.7	88.4
2007	270092	11574	4.28519	77.3	90.9	86.7	91.7
2008	319245	14535.4	4.55306	78.1	91	87	94.5
2009	348518	17541.9	5.03329	80.9	92.2	88.7	96.3
2010	412119	19980.4	4.84821	84.1	94.1	90.8	97.8
2011	487940	24345.9	4.98953	85.2	93.7	91	98.7
2012	538580	28119	5.22095	87.6	95	92.6	99.2
2013	592963	31669	5.3408	89.5	95.6	93.5	99.5
2014	643563	35312.4	5.48701	90	96.2	93.9	99.6
2015	688858	40974.6	5.9482	91.5	96.5	94.5	99.7
2016	746395	46344.9	6.20916	91.6	96.6	94.6	99.8
2017	832036	52598.3	6.32164	89.6	96.5	94	99.9
2018	919281	59121.9	6.43132	89.9	96.6	93.8	99.9
2019	986515	65841.4	6.67414	90.3	96.8	94.1	99.9
2020	1013567	72175	7.12089	92.7	97.4	95.5	99.9
